# Supplementary material
Source: publisher figshare collection journal article supplement (https://acs.figshare.com/ndownloader/files/15249989)
Supplement: Supplementary file 1 [file 15249989]

# Single crystallization of an organic semiconductor in hydrogel capillaries for transferring onto substrates

*Satoshi Watanabe<sup>1\*</sup>, Ryota Urata<sup>1</sup>, Tetsuya Sato<sup>1</sup>, Shintaro Ida<sup>1</sup>, Masashi Kunitake<sup>1\*</sup>*

## AUTHOR ADDRESS

- 1) Faculty of Advanced Science and Technology, Kumamoto University, 2-39-1  
Kurokami, Chuo-ku, Kumamoto city, Kumamoto, 860-8555, Japan.

## Support information

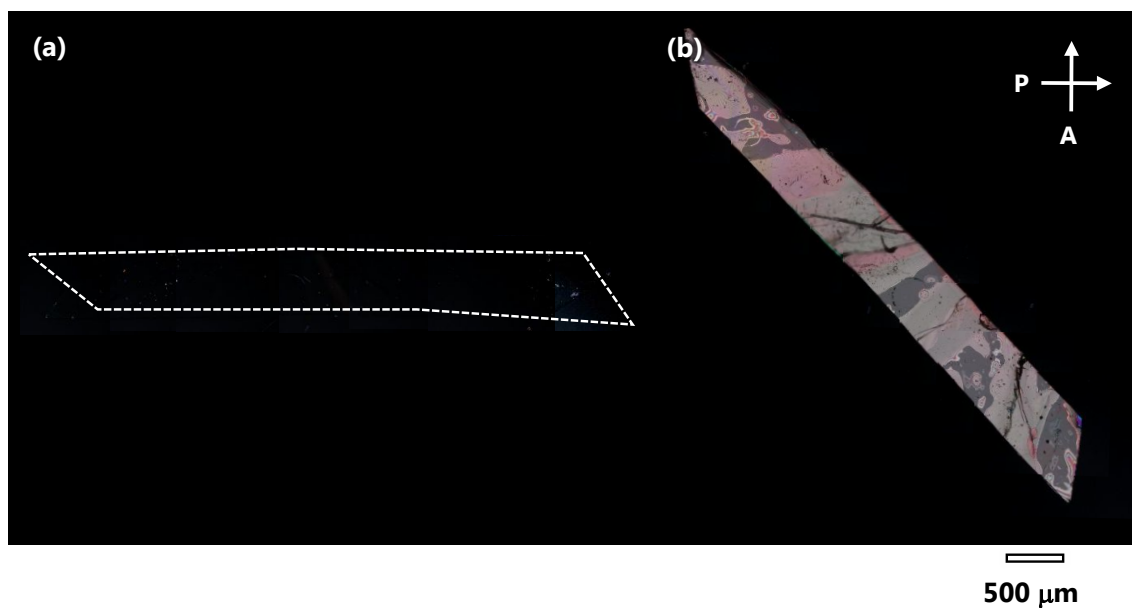

Figure S1 Crossed-Nicol microscope images of a C8-BTBT single crystal on a Si wafer. White dot lines guided the position of the crystals (a). The crystals were rotated at 45° from position a (b). Crystal was fabricated with an agarose gel capillary filled with C8-BTBT solution at 108 mM of C8-BTBT in DCB and 8-14 °C for 48h followed by dissolution of the gels with NaI solution and transferring on the Si wafer. White arrow shows a crossed-Nicol direction.

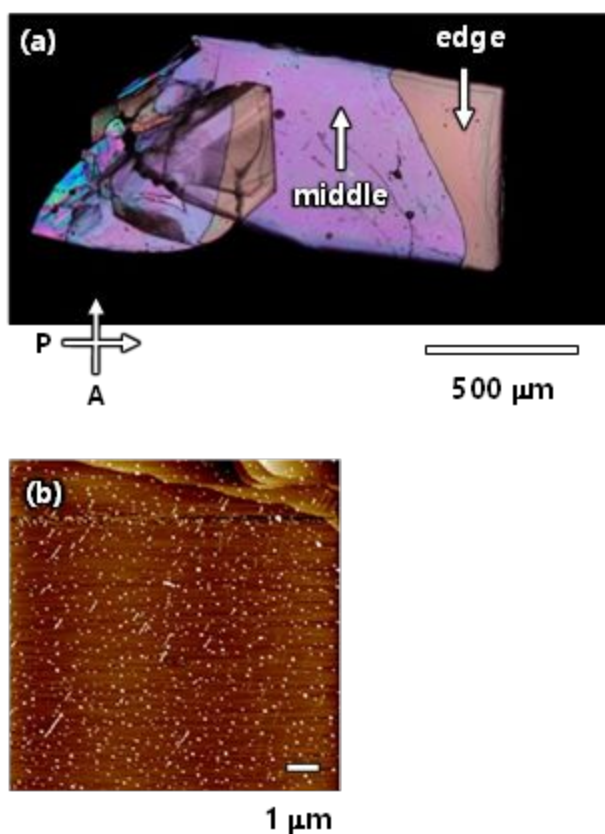

Figure S2 (a) Crossed-Nicol microscope image and (b) AFM image of a C8-BTBT single crystal on a Si wafer. AFM observation was carried out at the pointed positions on (b) the middle and the edge (Figure 6) of the crystal. Crystal was fabricated with an agarose gel capillary filled with C8-BTBT solution at 108 mM of C8-BTBT in DCB and 8-14 °C for 24 h followed by dissolution of the gels with NaI solution and transferring on the Si wafer. White arrow shows a crossed-Nicol direction.
